# Supplementary material for: BRAT1 deficiency causes increased glucose metabolism and mitochondrial malfunction
Source: PubMed Central journal article supplement (PMC4129107; doi:10.1186/1471-2407-14-548), 2014-07-29
Supplement: 12885_2014_4739_MOESM2_ESM.pdf [file 12885_2014_4739_MOESM2_ESM.pdf]

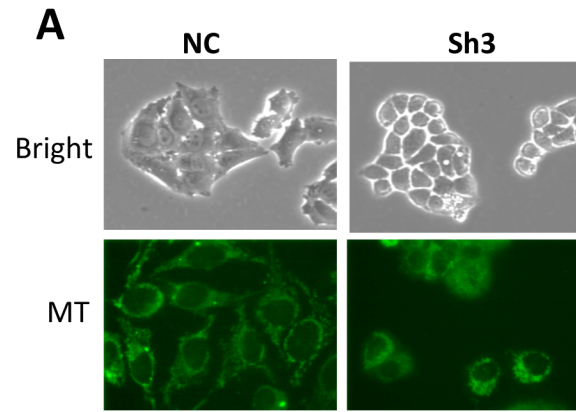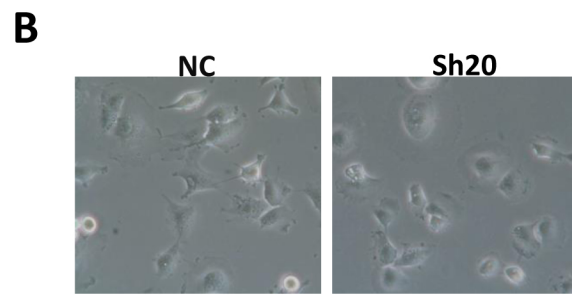

Supplement Figure 3
